# Supplementary material for: Modelling the impacts of emission changes on O 3 sensitivity, atmospheric oxidation capacity, and pollution transport over the Catalonia region
Source: Copernicus journal article supplement (doi:10.5194/acp-23-10751-2023), 2023-09-28
Supplement: Supplementary file 1 [file acp-23-10751-2023-supplement.pdf]

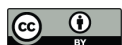

*Supplement of*

## **Modelling the impacts of emission changes on O<sub>3</sub> sensitivity, atmospheric oxidation capacity, and pollution transport over the Catalonia region**

**Alba Badia et al.**

*Correspondence to:* Alba Badia (alba.badia@uab.cat)

The copyright of individual parts of the supplement might differ from the article licence.

# 1 Observations

## 1.1 Air quality

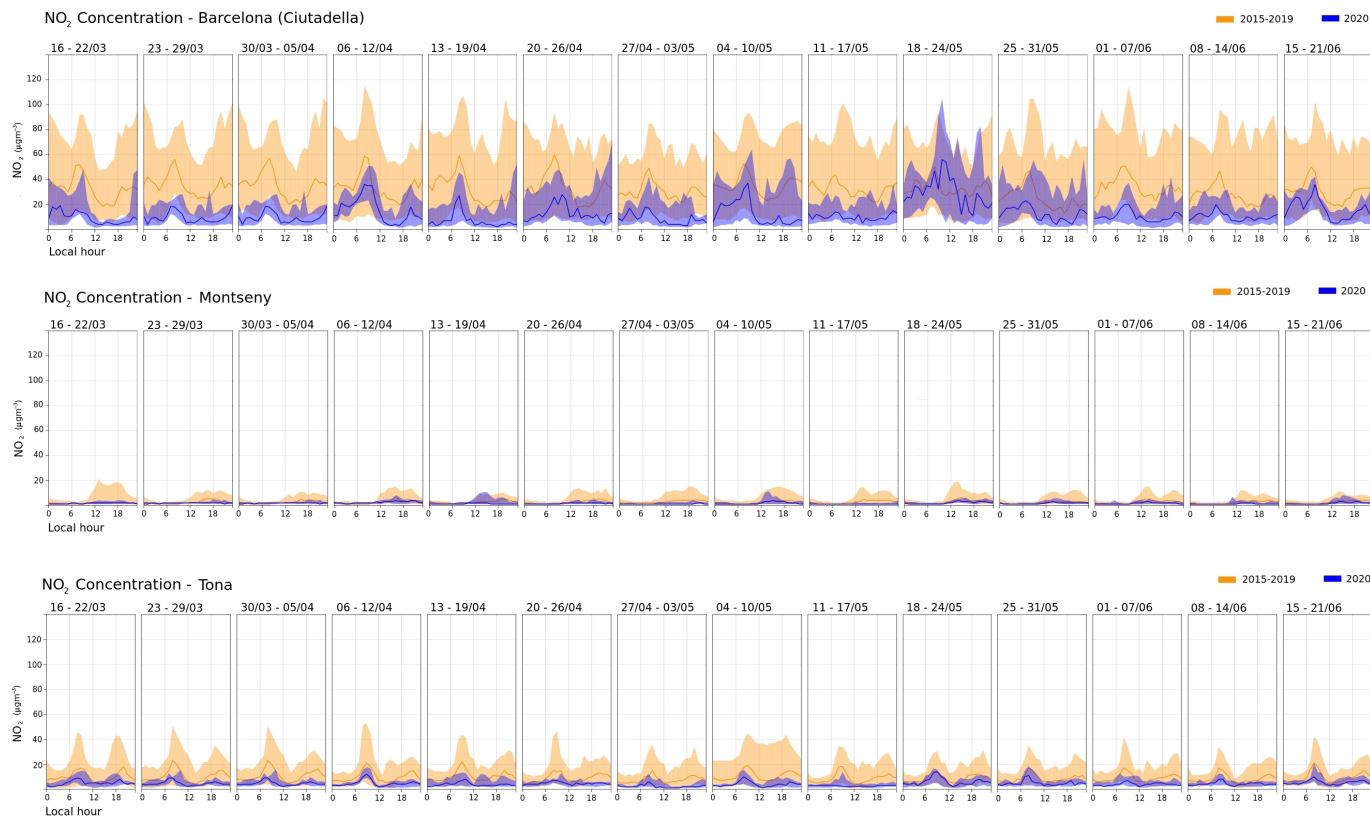

**Figure S1.** Variation for NO<sub>2</sub> concentrations during COVID-19 confinement and phase-out weeks (in blue) and the same month for the year 2019 (orange), observed at Eixample air quality monitoring station (as part of the Xarxa de Vigilància i Previsió de la Contaminació Atmosfèrica, XVPCA). Blue and orange lines show the medians (50th percentile) and shaded zones show the 10th/90th percentiles.

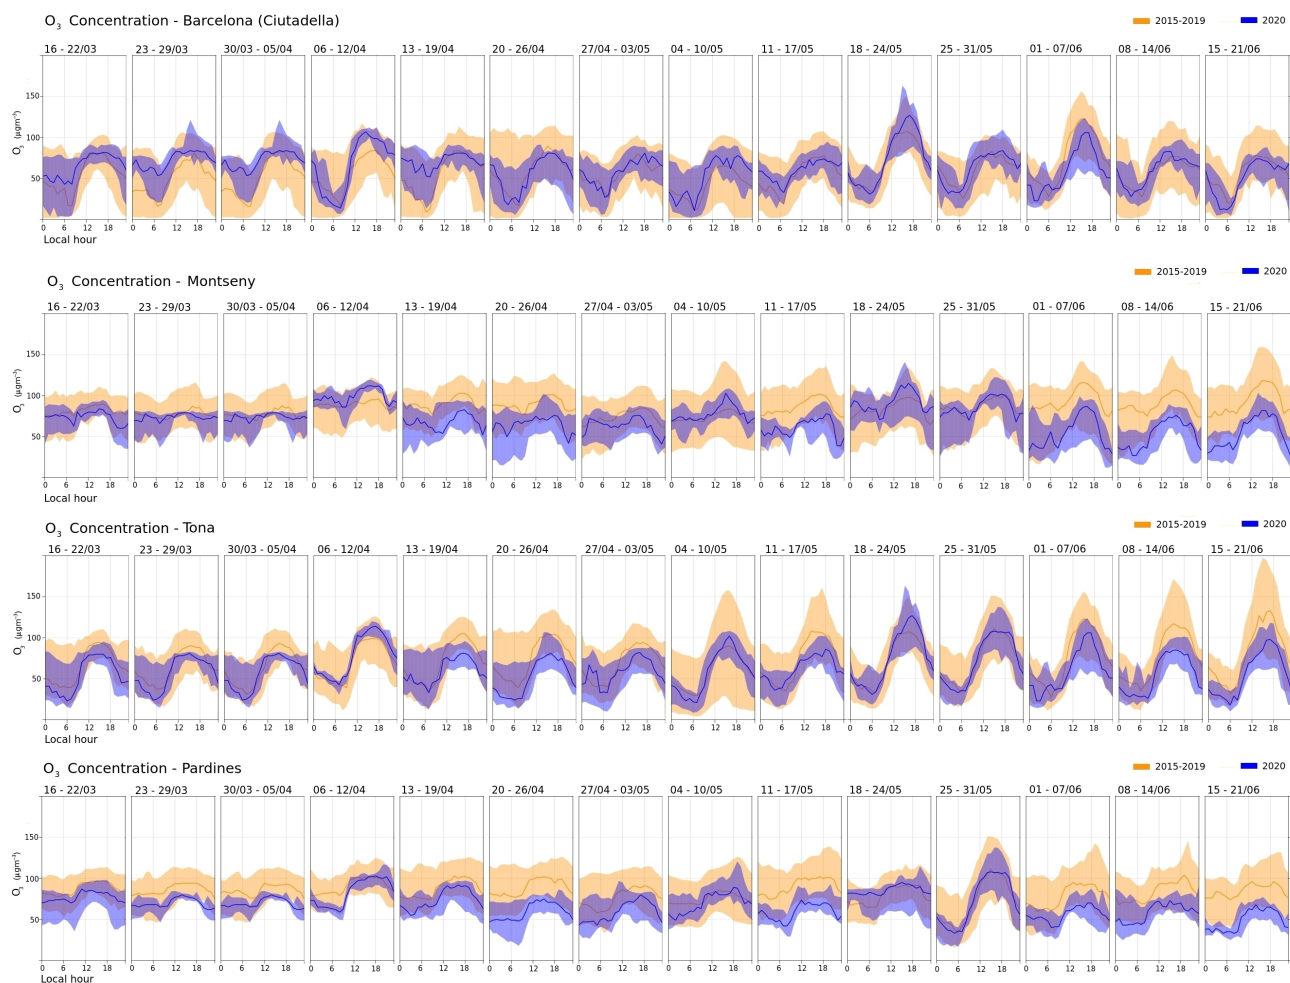

**Figure S2.** Variation for O<sub>3</sub> concentrations during COVID-19 confinement and phase-out weeks (in blue) and the same month for the year 2019 (orange), observed at different air quality monitoring stations (as part of the Xarxa de Vigilància i Previsió de la Contaminació Atmosfèrica, XVPCA). Blue and orange lines show the medians (50th percentile) and shaded zones show the 10th/90th percentiles.

**Table S1.** Ozone levels for 3rd and 6th of April 22 and 26 of May in Barcelona-Ciutadella, Montseny, Tona and, Pardines , observed at Eixample air quality monitoring station (as part of the Xarxa de Vigilància i Previsió de la Contaminació Atmosfèrica, XVPCA).

|                | <b>Ciutadella</b>                                           | <b>Montseny</b> | <b>Tona</b> | <b>Pardines</b> | <b>Ciutadella</b>                                                   | <b>Montseny</b> | <b>Tona</b> | <b>Pardines</b> |
|----------------|-------------------------------------------------------------|-----------------|-------------|-----------------|---------------------------------------------------------------------|-----------------|-------------|-----------------|
|                | <b>Min O<sub>3</sub> (<math>\mu\text{g m}^{-3}</math>)</b>  |                 |             |                 | <b>Max O<sub>3</sub> (<math>\mu\text{g m}^{-3}</math>)</b>          |                 |             |                 |
| <b>3 April</b> | 3                                                           | 54              | 15          | 52              | 88                                                                  | 92              | 86          | 81              |
| <b>6 April</b> | 14                                                          | 75              | 41          | 64              | 111                                                                 | 112             | 115         | 107             |
| <b>22 May</b>  | 2                                                           | 68              | 25          | 60              | 87                                                                  | 143             | 174         | 123             |
| <b>26 May</b>  | 63                                                          | 20              | 49          | 12              | 127                                                                 | 143             | 87          | 103             |
|                | <b>Mean O<sub>3</sub> (<math>\mu\text{g m}^{-3}</math>)</b> |                 |             |                 | <b>8 max h-mean O<sub>3</sub> (<math>\mu\text{g m}^{-3}</math>)</b> |                 |             |                 |
| <b>3 April</b> | 53.58                                                       | 70.96           | 49.92       | 70.50           | 76.6                                                                | 81              | 77.3        | 75.4            |
| <b>6 April</b> | 66.91                                                       | 95.33           | 78.29       | 87.13           | 103                                                                 | 109.63          | 110.5       | 104.88          |
| <b>22 May</b>  | 41.54                                                       | 100.13          | 81.71       | 86.71           | 64.13                                                               | 119.63          | 135.25      | 105.88          |
| <b>26 May</b>  | 91.54                                                       | 71.25           | 66.42       | 58.75           | 114.75                                                              | 114.63          | 80.75       | 99.13           |

## 1.2 Meteorology

**Table S2.** Meteorological conditions for 3 and 6 of April 22 and 26 of May near the sites of Barcelona-Ciutadella (Raval), Montseny (Viladrau), Tona (Muntanyola) and Pardines (Núria). Data is from the Servei Meteorològic de Catalunya (SMC), 2020.

|                | <b>Raval</b>                         | <b>Viladrau</b> | <b>Muntanyola</b> | <b>Núria</b> | <b>Raval</b>                           | <b>Viladrau</b> | <b>Muntanyola</b> | <b>Núria</b> |
|----------------|--------------------------------------|-----------------|-------------------|--------------|----------------------------------------|-----------------|-------------------|--------------|
|                | <b>Mean temperature (°C)</b>         |                 |                   |              | <b>Pressure at surface level (hPa)</b> |                 |                   |              |
| <b>3 April</b> | 13.5                                 | 6.5             | 6.9               | 0.3          | 1015.7                                 | 1015            | 1015.5            | 1016.2       |
| <b>6 April</b> | 14.5                                 | 8.7             | 10.5              | 3.6          | 1023.9                                 | 1022.7          | 1023.3            | 1023.4       |
| <b>22 May</b>  | 24.4                                 | 19.1            | 21.6              | 12.5         | 1022.5                                 | 1021.8          | 1022              | 1022.9       |
| <b>26 May</b>  | 23.1                                 | 16.2            | 19.1              | 9.8          | 1024.9                                 | 1024.5          | 1024.6            | 1025.5       |
|                | <b>Precipitation acumulated (mm)</b> |                 |                   |              | <b>Mean relative humidity (%)</b>      |                 |                   |              |
| <b>3 April</b> | 0                                    | 0               | 0                 | 0            | 61                                     | 87              | 76                | 63           |
| <b>6 April</b> | 0                                    | 0               | 0                 | 0            | 66                                     | 64              | 51                | 66           |
| <b>22 May</b>  | 0                                    | 0               | 0                 | 2.9          | 54                                     | 64              | 53                | 68           |
| <b>26 May</b>  | 0                                    | 0               | 0                 | 0            | 53                                     | 68              | 57                | 64           |
|                | <b>Max. Wind speed at 2m (km/h)</b>  |                 |                   |              | <b>Max. Wind direction at 2m (°)</b>   |                 |                   |              |
| <b>3 April</b> | 31.7                                 | 30.2            | 33.1              | 45.4         | 225                                    | 263             | 254               | 45           |
| <b>6 April</b> | 18.7                                 | 20.9            | 24.8              | 18.7         | 151                                    | 76              | 227               | 206          |
| <b>22 May</b>  | 27                                   | 22.3            | 25.2              | 19.1         | 207                                    | 75              | 232               | 211          |
| <b>26 May</b>  | 25.9                                 | 26.3            | 26.6              | 31           | 213                                    | 84              | 112               | 30           |
|                | <b>Solar irradiance (MJ/m2)</b>      |                 |                   |              |                                        |                 |                   |              |
| <b>3 April</b> | 21.5                                 | 20.6            | 24.2              | 24.3         |                                        |                 |                   |              |
| <b>6 April</b> | 22.6                                 | 23.8            | 23                | 19.2         |                                        |                 |                   |              |
| <b>22 May</b>  | 30.1                                 | 29              | 29.6              | 23.2         |                                        |                 |                   |              |
| <b>26 May</b>  | 29.8                                 | 27.1            | 28.2              | 28.6         |                                        |                 |                   |              |

## 5 2 Model validation

### 2.1 Meteorology

**Table S3.** Statistical evaluation of the model chemistry results, COVID simulation, over the Metropolitan Area of Barcelona (AMB) and Catalonia (CAT) for the 30 March - 12 April 2020 from observations in hourly basis. The number of stations are shown in parenthesis on the second column for AMB and CAT, respectively. The observation mean (OM), model mean (MM), mean bias (MB), normalised mean bias (NMB), root-mean-square error (RMSE), correlation (R) and the index of agreement (IOA) and are calculated between simulated and observed concentrations.

| Variable | Type         | OM    |       | MM    |       | MB    |       | NMB [0,1] |       | RMSE  |       | R[0,1] |      | IOA [0,1] |      |
|----------|--------------|-------|-------|-------|-------|-------|-------|-----------|-------|-------|-------|--------|------|-----------|------|
|          |              | AMB   | CAT   | AMB   | CAT   | AMB   | CAT   | AMB       | CAT   | AMB   | CAT   | AMB    | CAT  | AMB       | CAT  |
| T (°C)   | urban (5/6)  | 12.94 | 12.88 | 13.36 | 13.20 | 0.42  | 0.31  | 0.04      | 0.03  | 1.35  | 1.37  | 0.93   | 0.94 | 0.94      | 0.95 |
|          | rural (2/19) | 12.95 | 8.93  | 13.89 | 9.17  | 0.94  | 0.24  | 0.07      | 0.27  | 1.48  | 1.68  | 0.95   | 0.94 | 0.95      | 0.94 |
| RH (%)   | urban (5/6)  | 70.82 | 70.25 | 68.80 | 68.97 | -2.02 | -1.28 | -0.03     | -0.02 | 10.47 | 10.26 | 0.71   | 0.75 | 0.80      | 0.82 |
|          | rural (2/19) | 73.34 | 73.70 | 68.14 | 75.08 | -5.21 | 1.38  | -0.07     | 0.02  | 10.25 | 12.75 | 0.79   | 0.82 | 0.82      | 0.84 |
| WS (m/s) | urban (4/5)  | 2.43  | 2.38  | 2.83  | 2.93  | 0.40  | 0.55  | 0.36      | 0.39  | 1.91  | 1.88  | 0.79   | 0.81 | 0.74      | 0.76 |
|          | rural (1/11) | 1.99  | 1.81  | 3.23  | 3.67  | 1.24  | 1.86  | 0.62      | 1.28  | 2.39  | 2.74  | 0.62   | 0.48 | 0.66      | 0.50 |

**Table S4.** Same as Table 2 for the 18 to 30 May.

| Variable | Type         | OM    |       | MM    |       | MB    |      | NMB [0,1] |       | RMSE  |       | R [0,1] |      | IOA [0,1] |      |
|----------|--------------|-------|-------|-------|-------|-------|------|-----------|-------|-------|-------|---------|------|-----------|------|
|          |              | AMB   | CAT   | AMB   | CAT   | AMB   | CAT  | AMB       | CAT   | AMB   | CAT   | AMB     | CAT  | AMB       | CAT  |
| T (°C)   | urban (5/6)  | 21.14 | 21.20 | 21.30 | 21.22 | 0.16  | 0.03 | 0.01      | 0.00  | 1.46  | 1.49  | 0.90    | 0.92 | 0.93      | 0.94 |
|          | rural (2/19) | 21.07 | 17.55 | 21.96 | 17.71 | 0.90  | 0.16 | 0.04      | -0.00 | 1.60  | 1.90  | 0.93    | 0.94 | 0.94      | 0.94 |
| RH (%)   | urban (5/6)  | 64.36 | 63.88 | 65.91 | 66.04 | 1.55  | 2.16 | 0.03      | 0.04  | 10.50 | 10.31 | 0.75    | 0.78 | 0.84      | 0.85 |
|          | rural (2/19) | 69.15 | 67.02 | 65.34 | 71.60 | -3.80 | 4.59 | -0.055    | 0.073 | 9.37  | 13.35 | 0.82    | 0.82 | 0.88      | 0.84 |
| WS (m/s) | urban (4/5)  | 2.18  | 2.09  | 2.19  | 2.24  | 0.01  | 0.15 | 0.12      | 0.18  | 1.42  | 1.38  | 0.66    | 0.69 | 0.71      | 0.74 |
|          | rural (1/11) | 2.08  | 1.76  | 2.52  | 3.08  | 0.44  | 1.32 | 0.21      | 0.94  | 1.25  | 2.27  | 0.71    | 0.49 | 0.82      | 0.51 |

## 2.2 Air quality

**Table S5.** Statistical evaluation of the modelled chemistry (COVID simulation), over the Metropolitan Area of Barcelona (AMB) and Catalonia (CAT) for the 30 March - 12 April 2020 in hourly basis. The number of stations are shown in parenthesis on the second column for AMB and CAT, respectively. The observation mean (OM), model mean (MM), mean bias (MB), normalised mean bias (NMB), root-mean-square error (RMSE), correlation (R) and the index of agreement (IOA) and are calculated between simulated and observed concentrations. Stations are classified into urban background, urban traffic, suburban background, and rural background.

| Specie          | Type              | OM ( $\mu\text{g m}^{-3}$ ) |       | MM ( $\mu\text{g m}^{-3}$ ) |       | MB ( $\mu\text{g m}^{-3}$ ) |       | NMB [0,1] |       | RMSE ( $\mu\text{g m}^{-3}$ ) |       | R [0,1] |      | IOA [0,1] |      |
|-----------------|-------------------|-----------------------------|-------|-----------------------------|-------|-----------------------------|-------|-----------|-------|-------------------------------|-------|---------|------|-----------|------|
|                 |                   | AMB                         | CAT   | AMB                         | CAT   | AMB                         | CAT   | AMB       | CAT   | AMB                           | CAT   | AMB     | CAT  | AMB       | CAT  |
| NO <sub>2</sub> | urban b. (8/13)   | 14.28                       | 13.81 | 13.16                       | 11.56 | -1.12                       | -2.25 | -0.06     | -0.15 | 14.05                         | 13.55 | 0.45    | 0.43 | 0.43      | 0.39 |
|                 | urban t. (5/9)    | 16.65                       | 16.10 | 11.02                       | 9.92  | -5.63                       | -6.18 | -0.37     | -0.42 | 15.46                         | 15.09 | 0.44    | 0.4  | 0.45      | 0.41 |
|                 | suburb. b. (5/13) | 10.73                       | 9.60  | 8.21                        | 5.80  | -2.52                       | -3.8  | -0.26     | -0.45 | 9.16                          | 8.55  | 0.39    | 0.39 | 0.41      | 0.34 |
|                 | rural b. (-/4)    | -                           | 3.23  | -                           | 1.09  | -                           | -2.14 | -         | -0.63 | -                             | 2.88  | -       | 0.32 | -         | 0.15 |
| O <sub>3</sub>  | urban b.(4/7)     | 71.57                       | 71.88 | 85.67                       | 84.51 | 13.63                       | 12.63 | 0.20      | 0.17  | 25.12                         | 25.19 | 0.73    | 0.70 | 0.48      | 0.50 |
|                 | urban t. (2/8)    | 65.94                       | 68.96 | 83.63                       | 88.16 | 17.69                       | 19.20 | 0.26      | 0.28  | 31.96                         | 30.55 | 0.61    | 0.62 | 0.50      | 0.51 |
|                 | suburb. b. (4/8)  | 83.93                       | 74.74 | 101.6                       | 93.73 | 17.67                       | 18.99 | 0.22      | 0.26  | 22.43                         | 25.19 | 0.73    | 0.66 | 0.51      | 0.46 |
|                 | rural b. (-/)     | -                           | 76.06 | -                           | 92.43 | -                           | 16.37 | -         | 0.22  | -                             | 27.81 | -       | 0.42 | -         | 0.42 |

**Table S6.** Same as Table 3 for the 18 to 30 May.

| Specie          | Type              | OM ( $\mu\text{g m}^{-3}$ ) |       | MM ( $\mu\text{g m}^{-3}$ ) |       | MB ( $\mu\text{g m}^{-3}$ ) |        | NMB [0,1] |       | RMSE ( $\mu\text{g m}^{-3}$ ) |       | R[0,1] |      | IOA [0,1] |      |
|-----------------|-------------------|-----------------------------|-------|-----------------------------|-------|-----------------------------|--------|-----------|-------|-------------------------------|-------|--------|------|-----------|------|
|                 |                   | AMB                         | CAT   | AMB                         | CAT   | AMB                         | CAT    | AMB       | CAT   | AMB                           | CAT   | AMB    | CAT  | AMB       | CAT  |
| NO <sub>2</sub> | urban b. (-/12)   | 19.50                       | 17.91 | 16.44                       | 13.59 | -3.05                       | -4.32  | -0.15     | -0.24 | 18.38                         | 16.58 | 0.23   | 0.27 | 0.41      | 0.38 |
|                 | urban t. (5/9)    | 30.22                       | 23.3  | 20.4                        | 10.25 | -9.82                       | -13.05 | -0.32     | -0.6  | 24.94                         | 21.27 | 0.20   | 0.23 | 0.33      | 0.25 |
|                 | suburb. b. (5/13) | 13.69                       | 12.14 | 10.87                       | 7.18  | -2.81                       | -4.96  | -0.26     | -0.42 | 11.33                         | 10.94 | 0.40   | 0.30 | 0.528     | 0.38 |
|                 | rural b. (-/4)    | -                           | 3.23  | -                           | 1.09  | -                           | -2.14  | -         | -0.66 | -                             | 2.96  | -      | 0.24 | -         | 0.26 |
| O <sub>3</sub>  | urban b. (4/7)    | 66.18                       | 68.14 | 78.83                       | 79.14 | 12.65                       | 11.01  | 0.21      | 0.17  | 28.18                         | 27.98 | 0.62   | 0.60 | 0.54      | 0.55 |
|                 | urban t. (2/8)    | 60.03                       | 61.10 | 77.32                       | 77.62 | 17.29                       | 16.59  | 0.28      | 0.27  | 29.35                         | 29.62 | 0.62   | 0.60 | 0.48      | 0.51 |
|                 | suburb. b. (4/8)  | 79.00                       | 69.38 | 88.00                       | 84.87 | 9.01                        | 15.49  | 0.13      | 0.24  | 28.43                         | 32.31 | 0.51   | 0.49 | 0.52      | 0.49 |
|                 | rural b. (-/12)   | -                           | 75.86 | -                           | 86.44 | -                           | 10.57  | -         | 0.16  | -                             | 27.82 | -      | 0.42 | -         | 0.44 |

### 3 Modelled air quality

## March-April

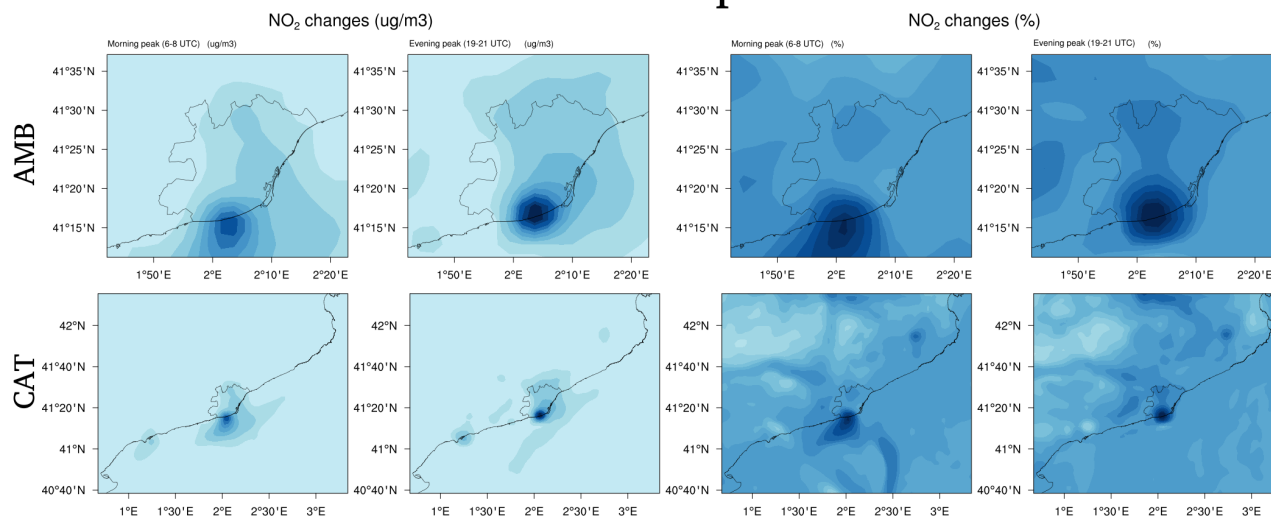

## May

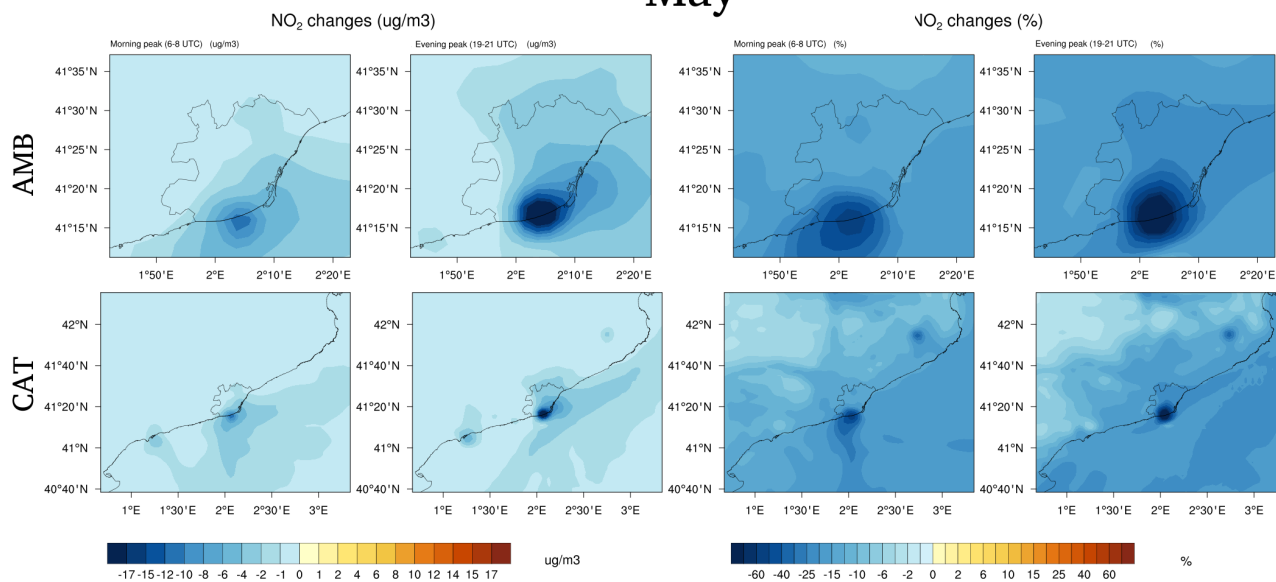

**Figure S3.** Averaged surface  $\text{NO}_2$  changes over the Metropolitan Area of Barcelona (AMB) and the Catalonia region (CAT) during 30 March to 12 April (only weekdays) and 18 to 30 May (only weekdays) in absolute value ( $\mu\text{g}/\text{m}^3$ ) and relative change (%). Relative change (%) is calculated as  $(\text{COVID-BAU})/\text{BAU} \times 100$ .



# March-April

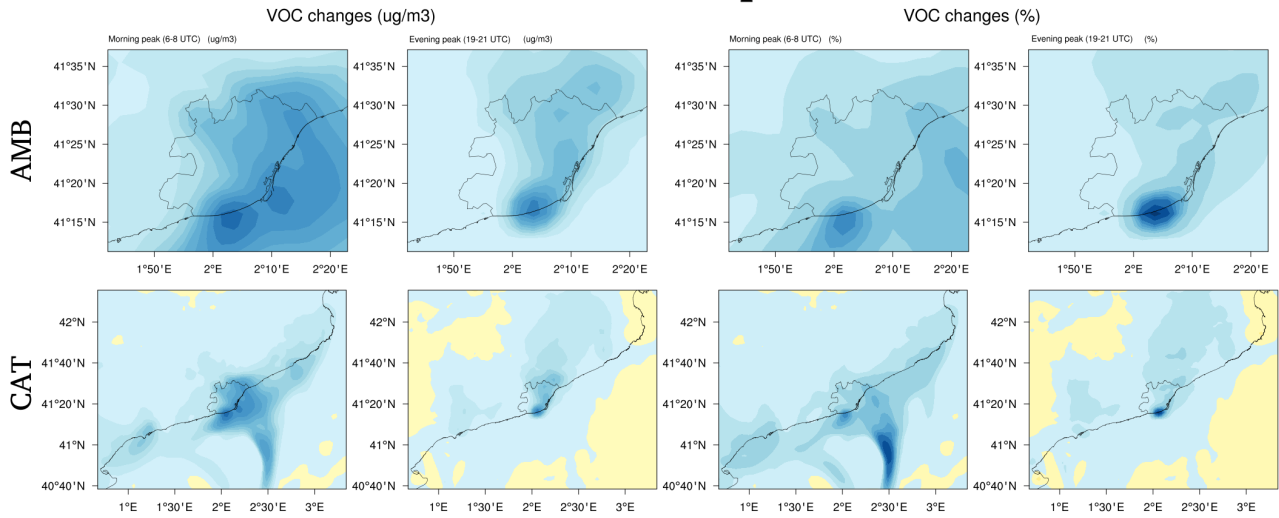

# May

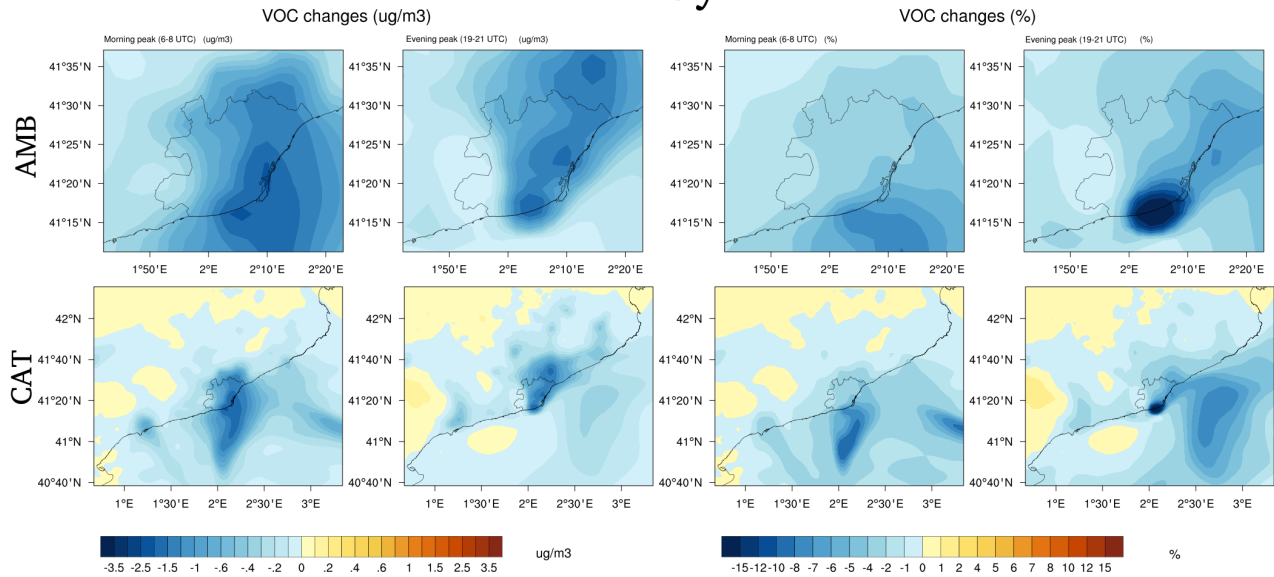

Figure S4. Same as Figure S3 for VOC changes.

# March-April

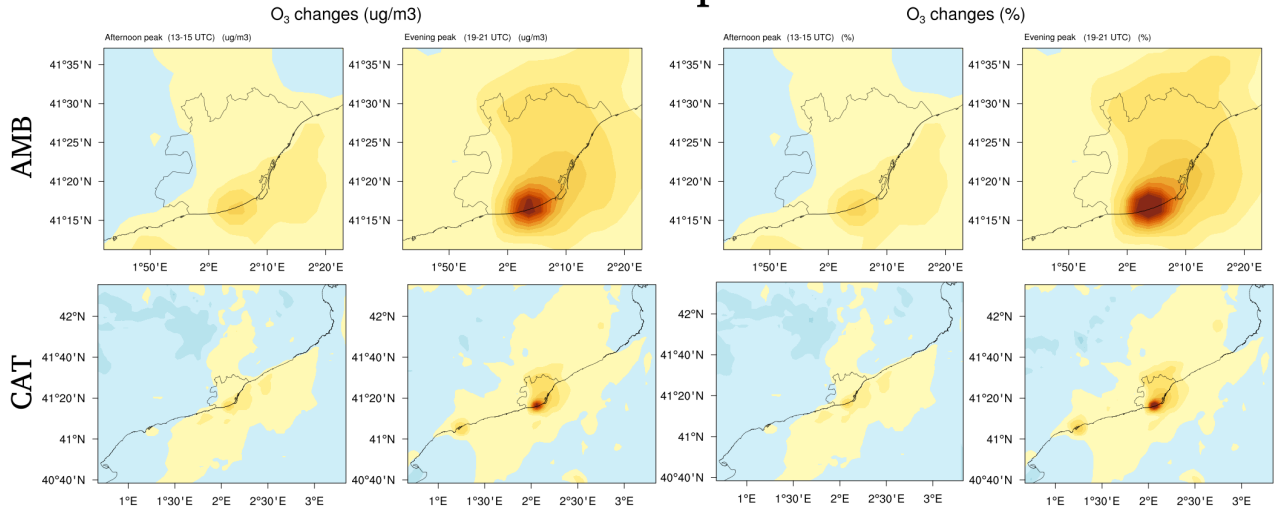

# May

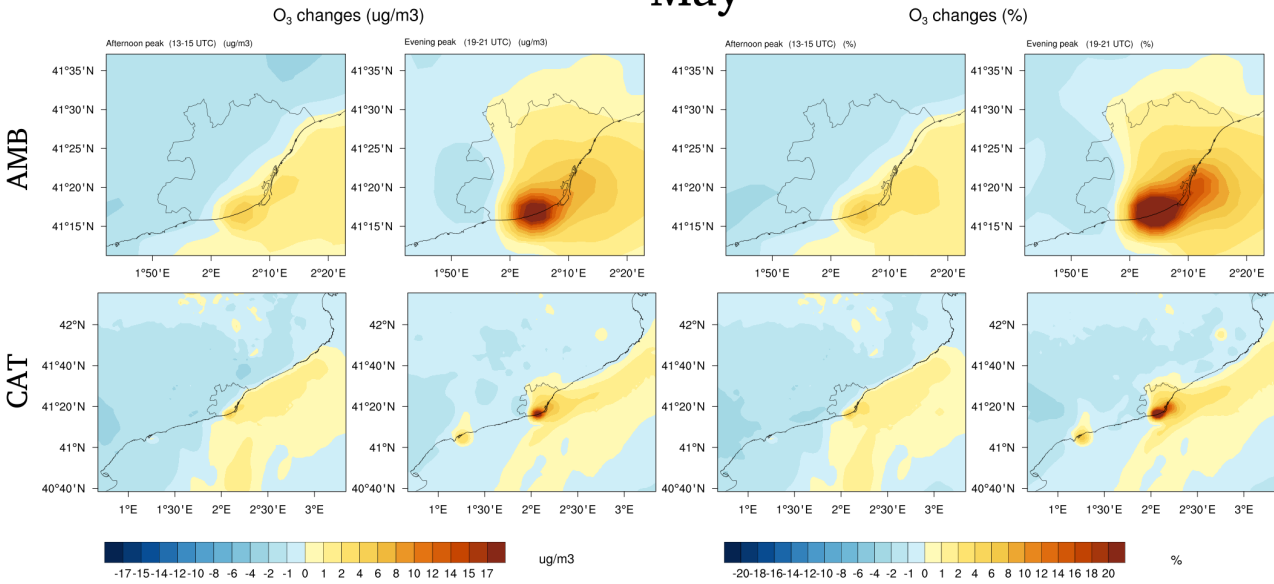

Figure S5. Same as Figure S3 for O<sub>3</sub> changes.

# March-April

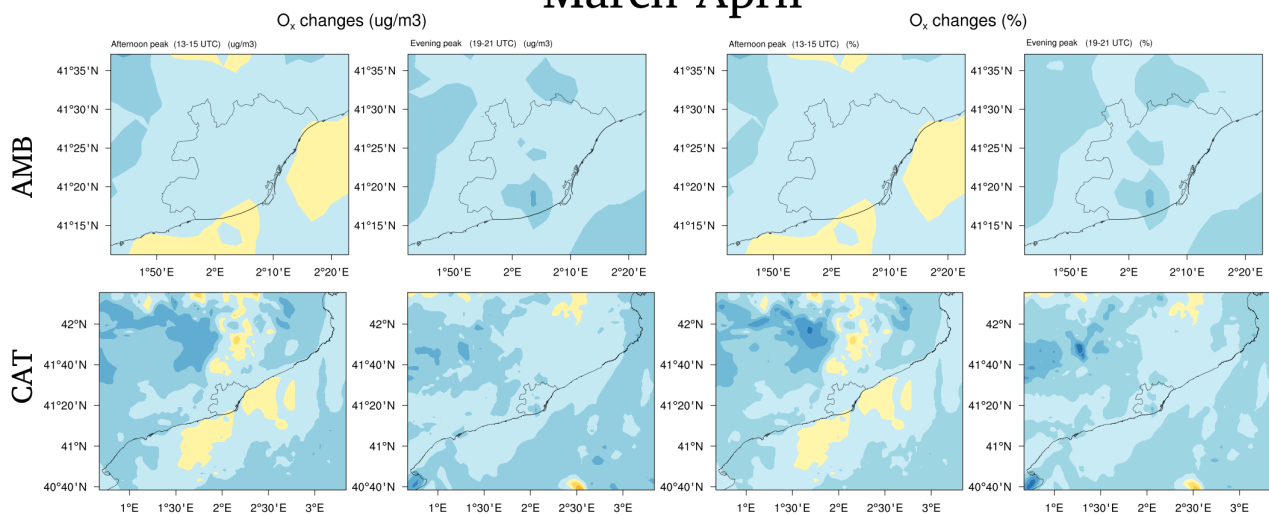

# May

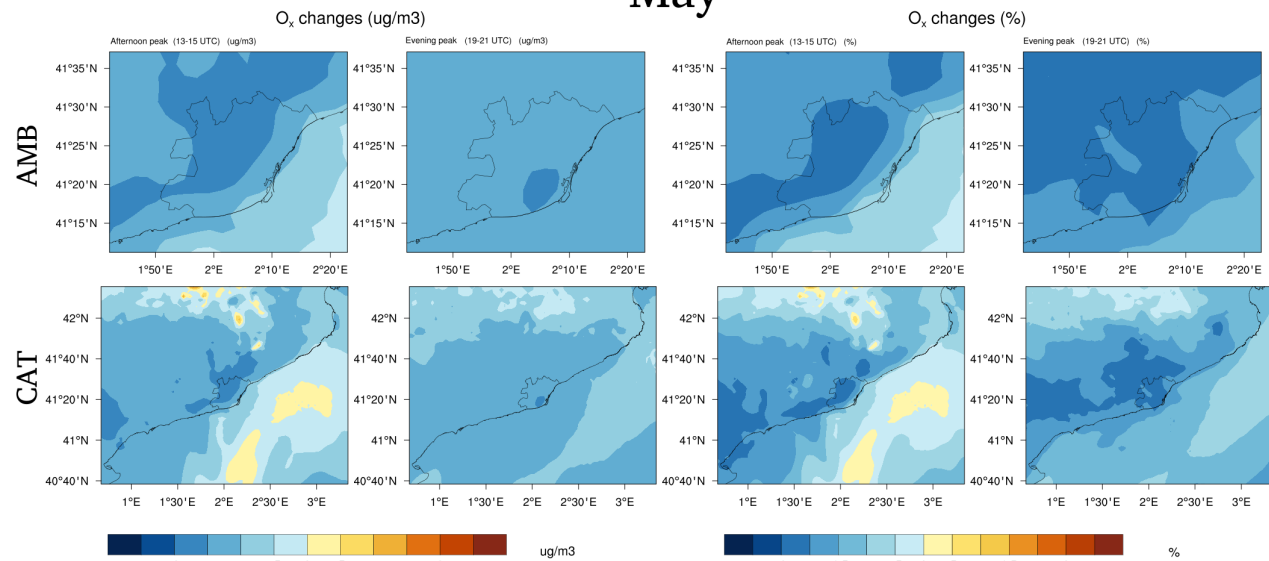

Figure S6. Same as Figure S3 for  $O_x$  changes.

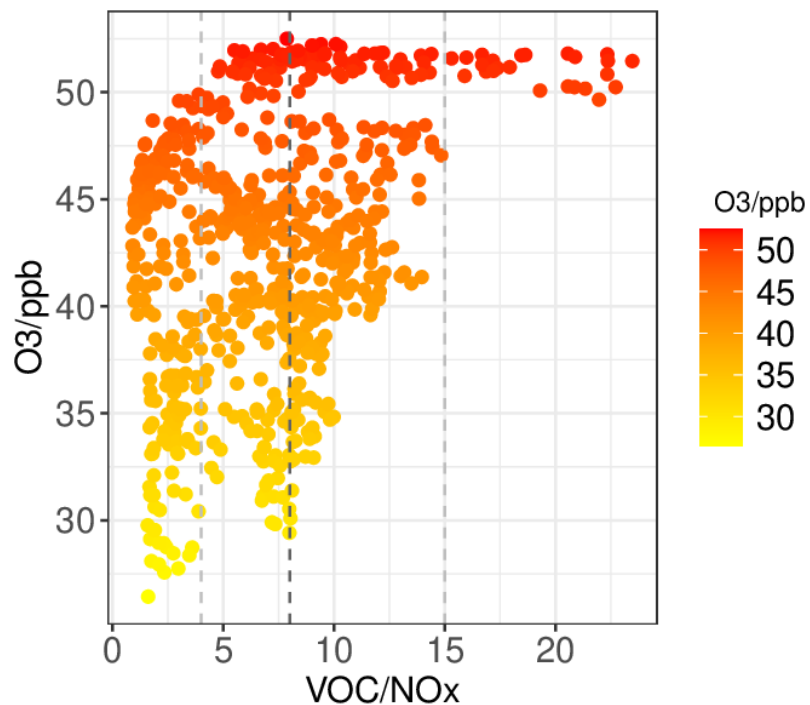

**Figure S7.** O<sub>3</sub> concentration as a function of VOC/NO<sub>x</sub> concentration. Points are calculated with a 5 hours average concentration for the two periods using the BAU simulation. Dark vertical line separate the two photochemical regimes by the local O<sub>3</sub> maximum. Grey vertical lines separate the transitional regimes.

# O<sub>3</sub> levels (ppb) - 03/04/2020

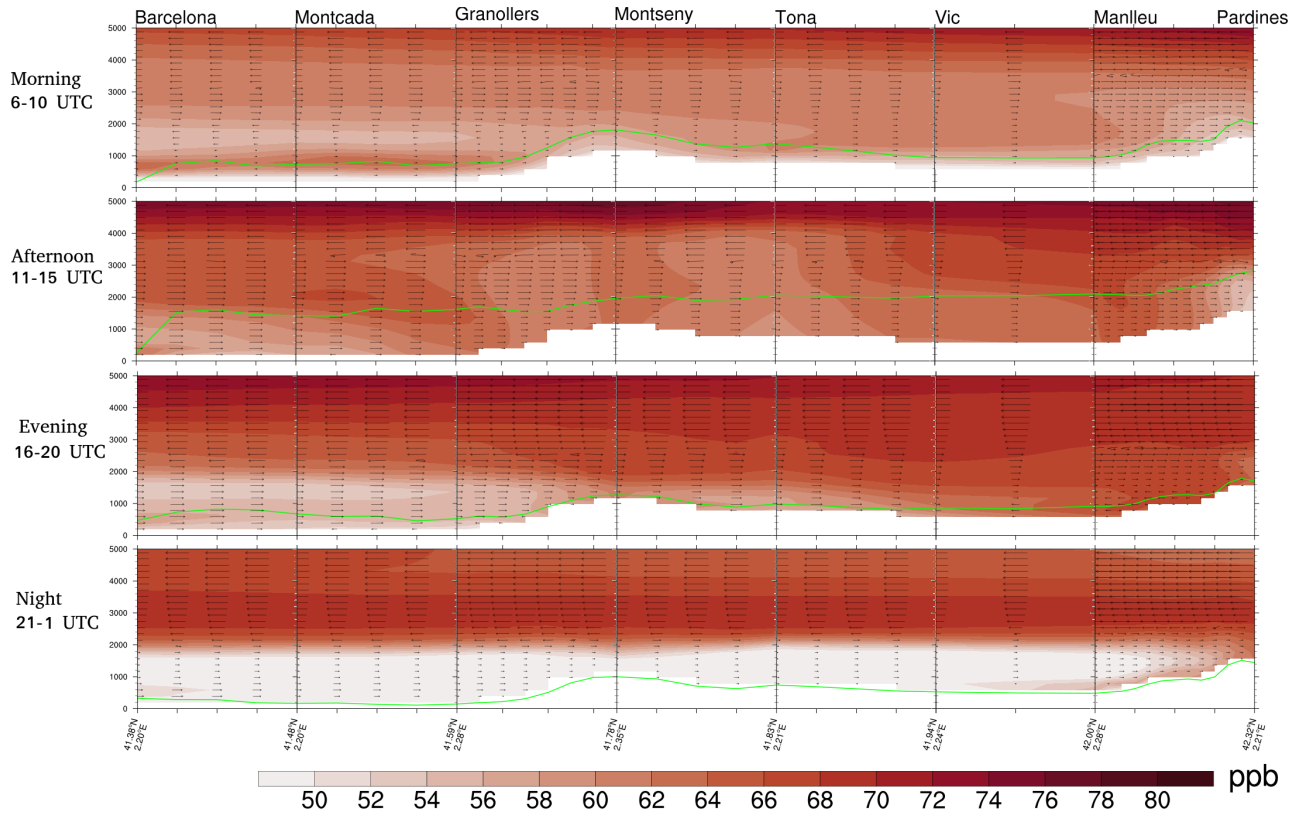

**Figure S8.** O<sub>3</sub> levels in BAU simulation along the atmospheric plume from the AMB to the Pyrenees for the 3rd of April. The modelled PBLH is shown with a green line. Black arrows are plotted for the the wind (u,v).

# O<sub>3</sub> levels (ppb) - 06/04/2020

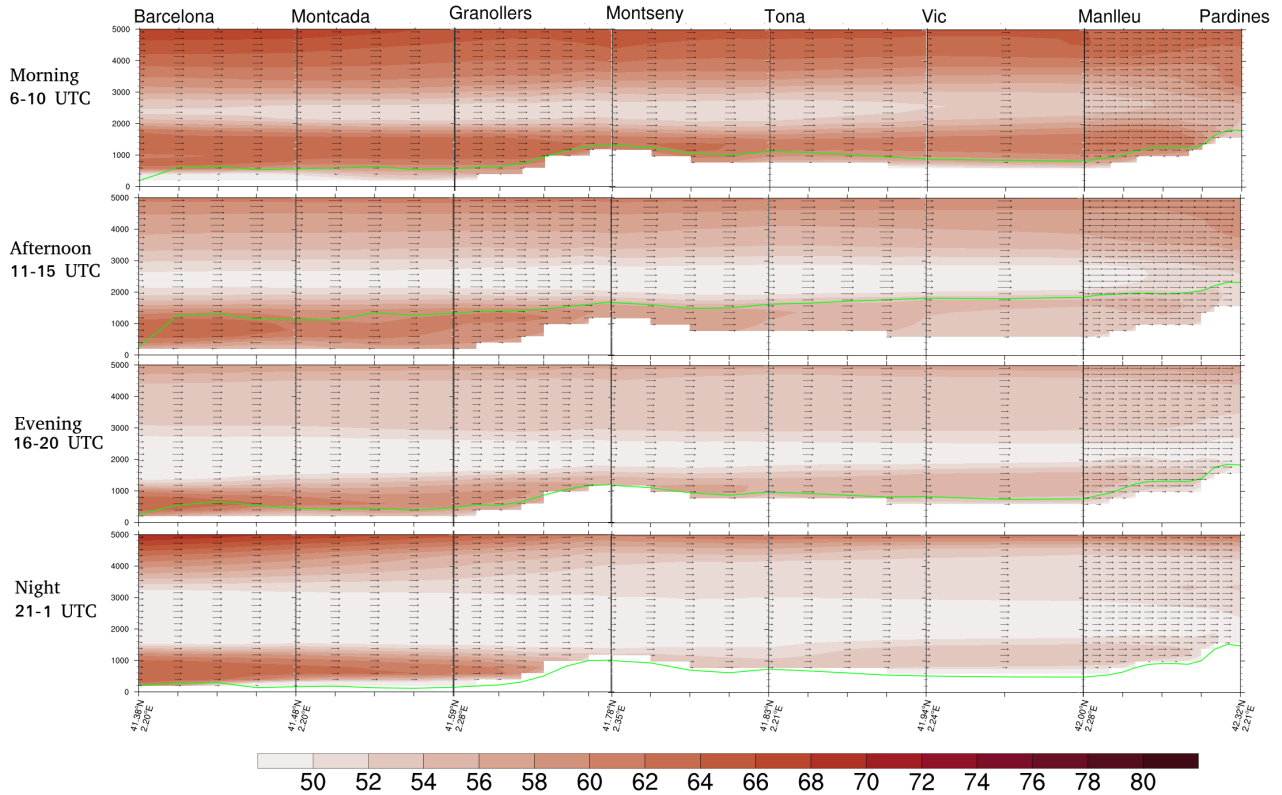

**Figure S9.** O<sub>3</sub> levels in BAU simulation along the atmospheric plume from the AMB to the Pyrenees for the 6rd of April. The modelled PBLH is shown with a green line. Black arrows are plotted for the the wind (u,v).

### O<sub>3</sub> levels (ppb) - 22/05/2020

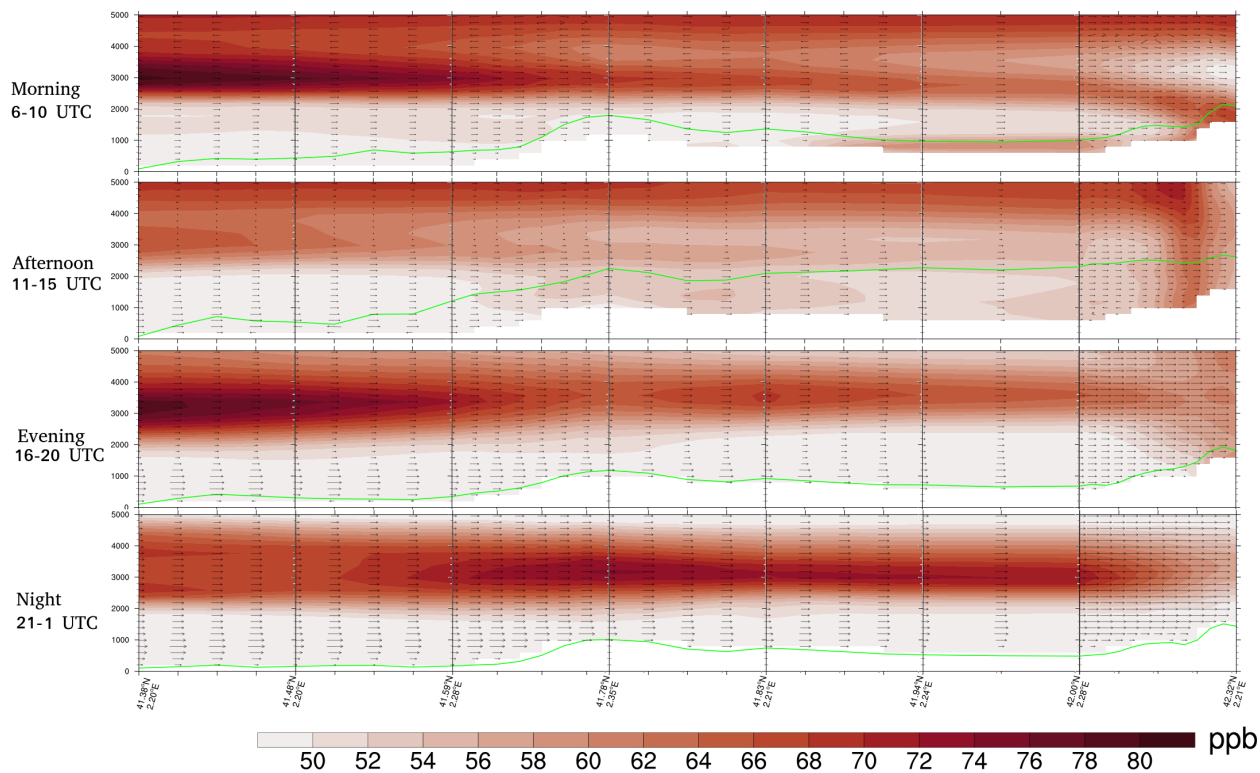

**Figure S10.** O<sub>3</sub> levels in BAU simulation along the atmospheric plume from the AMB to the Pyrenees for the 22nd of May. The modelled PBLH is shown with a green line. Black arrows are plotted for the the wind (u,v).

# O<sub>3</sub> levels (ppb) - 25/05/2020

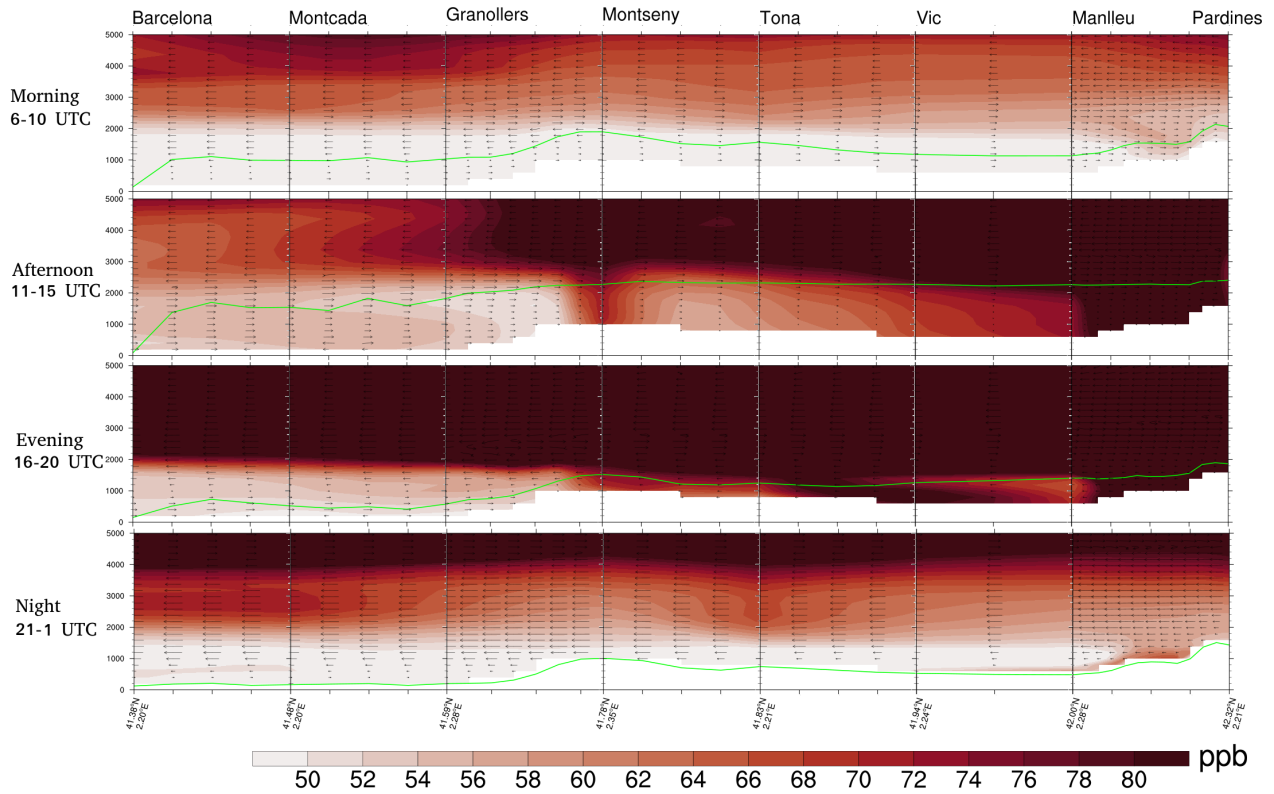

**Figure S11.** O<sub>3</sub> levels in BAU simulation along the atmospheric plume from the AMB to the Pyrenees for the 26th of May. The modelled PBLH is shown with a green line. Black arrows are plotted for the the wind (u,v).



**Table S7.** Average and relative change concentrations for NO<sub>x</sub>, O<sub>3</sub> and VOCs during the 30 March to 12 April (only weekdays) in the morning (6-8 UTC), midday (13-15 UTC) and afternoon (19-21 UTC). Average concentrations are in ppb for NO<sub>x</sub> and O<sub>3</sub> and ppbC for VOCs and the relative change (%) is calculated as (COVID-BAU)/BAU×100.

| Pollutant       | Landuse       | Morning |       |        | Afternoon |       |        | Evening |       |        |
|-----------------|---------------|---------|-------|--------|-----------|-------|--------|---------|-------|--------|
|                 |               | BAU     | COVID | Change | BAU       | COVID | Change | BAU     | COVID | Change |
| NO <sub>x</sub> | Forest        | 2.9     | 2.3   | -20.5  | 1.0       | 0.8   | -21.9  | 3.4     | 2.6   | -23.7  |
|                 | Natural Open  | 3.5     | 2.1   | -40.4  | 1.3       | 0.9   | -26.3  | 3.4     | 2.1   | -36.4  |
|                 | Agriculture   | 4.8     | 3.0   | -37.1  | 1.5       | 1.0   | -30.1  | 4.7     | 2.8   | -40.3  |
|                 | Water         | 10.2    | 7.8   | -24.2  | 5.0       | 3.9   | -22.3  | 9.4     | 6.9   | -27.0  |
|                 | Compact urban | 8.8     | 7.2   | -18.4  | 3.3       | 2.6   | -19.2  | 9.0     | 6.9   | -23.3  |
|                 | Open urban    | 4.1     | 2.8   | -30.9  | 1.5       | 1.1   | -25.3  | 4.8     | 3.5   | -26.7  |
|                 | Industrial    | 6.1     | 4.8   | -21.7  | 2.2       | 1.6   | -25.6  | 6.8     | 4.7   | -31.1  |
| VOC             | Forest        | 28.4    | 27.7  | -2.1   | 13.7      | 13.6  | -1.3   | 23.8    | 23.5  | -1.3   |
|                 | Natural Open  | 22.2    | 21.5  | -3.3   | 11.9      | 11.7  | -1.3   | 17.5    | 17.2  | -1.7   |
|                 | Agriculture   | 30.8    | 30.0  | -2.6   | 13.2      | 13    | -1.6   | 24.1    | 23.7  | -1.7   |
|                 | Water         | 40.8    | 38.9  | -4.5   | 10.1      | 9.9   | -2.4   | 13.3    | 12.9  | -2.9   |
|                 | Compact urban | 53.0    | 51.8  | -2.4   | 19.3      | 19    | -1.8   | 38.2    | 37.5  | -1.9   |
|                 | Open urban    | 32.8    | 31.7  | -3.3   | 13.9      | 13.6  | -2.0   | 26.4    | 25.9  | -1.8   |
|                 | Industrial    | 40.9    | 39.9  | -2.5   | 16.3      | 16    | -1.9   | 31.7    | 31.1  | -1.9   |
| O <sub>3</sub>  | Forest        | 40.3    | 40.7  | 1.0    | 51.7      | 51.7  | 0.0    | 42.3    | 42.9  | 1.3    |
|                 | Natural Open  | 42.8    | 43.9  | 2.5    | 51.7      | 51.9  | 0.3    | 45.4    | 46.4  | 2.1    |
|                 | Agriculture   | 37.3    | 38.5  | 3.4    | 51        | 51.2  | 0.4    | 40.7    | 42.2  | 3.7    |
|                 | Water         | 37      | 38.7  | 4.6    | 48.6      | 49.4  | 1.6    | 42.1    | 44.2  | 5.0    |
|                 | Compact urban | 35.8    | 36.9  | 2.9    | 52        | 52.3  | 0.6    | 40.4    | 42.2  | 4.3    |
|                 | Open urban    | 39.4    | 40.4  | 2.4    | 52.6      | 52.8  | 0.3    | 42.6    | 43.6  | 2.4    |
|                 | Industrial    | 36.8    | 37.7  | 2.3    | 52.2      | 52.5  | 0.5    | 40.1    | 41.8  | 4.2    |

**Table S8.** Same as Table S7 for the 18 to 30 May (only weekdays).

| Pollutant       | Landuse       | Morning |       |        | Afternoon |       |        | Evening |       |        |
|-----------------|---------------|---------|-------|--------|-----------|-------|--------|---------|-------|--------|
|                 |               | BAU     | COVID | Change | BAU       | COVID | Change | BAU     | COVID | Change |
| NO <sub>x</sub> | Forest        | 2.6     | 2.2   | -16    | 1.0       | 0.8   | -25.3  | 4.0     | 3.2   | -21.4  |
|                 | Natural Open  | 3.5     | 2.4   | -32.3  | 1.1       | 0.7   | -34.7  | 3.4     | 2.2   | -37.2  |
|                 | Agriculture   | 4.5     | 3.2   | -30.2  | 1.2       | 0.7   | -39.7  | 5.1     | 3     | -41.2  |
|                 | Water         | 15.3    | 11.5  | -24.8  | 8.0       | 5.9   | -26.2  | 15      | 10.8  | -27.9  |
|                 | Compact urban | 8.1     | 6.9   | -15.5  | 3.5       | 2.7   | -23.9  | 10.6    | 8.1   | -24.0  |
|                 | Open urban    | 3.9     | 2.9   | -25.3  | 1.7       | 1.2   | -27.5  | 5.5     | 4.1   | -24.9  |
|                 | Industrial    | 6.0     | 4.8   | -20.0  | 2.2       | 1.5   | -31.5  | 7.6     | 5.2   | -31.7  |
| VOC             | Forest        | 34.2    | 33.3  | -2.5   | 18.7      | 18.5  | -0.9   | 28.7    | 27.9  | -2.8   |
|                 | Natural Open  | 28.7    | 27.7  | -3.3   | 13.8      | 13.5  | -2.2   | 17.5    | 17    | -3.2   |
|                 | Agriculture   | 36.8    | 35.6  | -3.2   | 15.5      | 15.2  | -1.7   | 26.5    | 25.5  | -3.6   |
|                 | Water         | 43.8    | 41.2  | -5.9   | 10.1      | 8.9   | -11.6  | 11.3    | 10.5  | -7.9   |
|                 | Compact urban | 59.1    | 56.9  | -3.8   | 22.4      | 21.6  | -3.6   | 40.6    | 38.5  | -5.1   |
|                 | Open urban    | 38.7    | 37.3  | -3.7   | 17.2      | 16.7  | -2.7   | 28.8    | 27.5  | -4.4   |
|                 | Industrial    | 48.1    | 46.3  | -3.6   | 20.5      | 19.9  | -2.5   | 33.1    | 31.6  | -4.6   |
| O <sub>3</sub>  | Forest        | 36.9    | 36.7  | -0.6   | 51.3      | 50.5  | -1.6   | 37.7    | 37.6  | -0.1   |
|                 | Natural Open  | 37.0    | 37.3  | 0.6    | 48.9      | 48.3  | -1.3   | 40.3    | 40.6  | 0.8    |
|                 | Agriculture   | 33.3    | 33.8  | 1.4    | 50.5      | 49.9  | -1.2   | 36.3    | 37.3  | 3.0    |
|                 | Water         | 29.7    | 31.2  | 4.9    | 42.5      | 43.4  | 2.2    | 32.0    | 35    | 9.4    |
|                 | Compact urban | 33.6    | 33.9  | 1.0    | 50.8      | 50.4  | -0.8   | 35.8    | 37.2  | 3.8    |
|                 | Open urban    | 36.7    | 36.9  | 0.5    | 51.3      | 50.7  | -1.1   | 38.2    | 38.6  | 1.1    |
|                 | Industrial    | 34.3    | 34.6  | 0.9    | 52.1      | 51.6  | -1.1   | 36.3    | 37.6  | 3.5    |

## 4 Land use categories

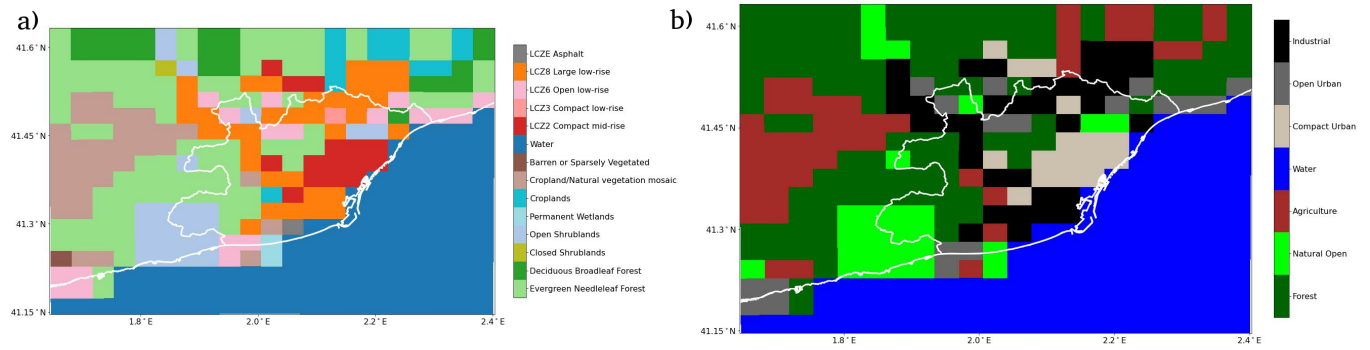

**Figure S12.** Land-use classification in the model (a) and for the model analysis (b). The white line define the AMB limits.

**Table S9.** Land-use classification for the model analysis

| Model land-use                    | Land-use category for the model analysis |
|-----------------------------------|------------------------------------------|
| Evergreen Needleleaf Forest       | Forests                                  |
| Deciduous Broadleaf Forest        | Forests                                  |
| Mixed Forest                      | Forests                                  |
| Closed Shrublands                 | Natural open areas                       |
| Open Shrublands                   | Natural open areas                       |
| Grassland                         | Natural open areas                       |
| Permanent Wetlands                | Natural open areas                       |
| Croplands                         | Natural open areas                       |
| Barren or Sparsely Vegetated      | Agricultural areas                       |
| Cropland/Nature Vegetation Mosaic | Agricultural areas                       |
| Water                             | Water                                    |
| LCZ1 Compact high-rise            | Compact urban areas                      |
| LCZ2 Compact mid-rise             | Compact urban areas                      |
| LCZ3 Compact low-rise             | Compact urban areas                      |
| LCZ5 Open mid-rise                | Open urban areas                         |
| LCZ6 Open low-rise                | Open urban areas                         |
| LCZ9 Sparsely built               | Open urban areas                         |
| LCZ8 Large low-rise               | Industrial, commercial and airport areas |
| LCZ10 Heavy industry              | Industrial, commercial and airport areas |
| LCZE Asphalt                      | Industrial, commercial and airport areas |

## 10 **References**

Servei Meteorològic de Catalunya (SMC), .: Butlletí climàtic mensual (maig del 2020), Tech. rep., Departament de Territori i Sostenibilitat., 2020.
